1 **Chilling induces unidirectional solute leak through the locust gut**  
2 **epithelia**

3

4

5 Kaylen Brzezinski and Heath A. MacMillan

6

7

8 Department of Biology, Carleton University, Ottawa, Canada, K1S 5B6

9

10

11

12

13

14

15 **Keywords:** Chill tolerance, chilling injury, paracellular leak, dextran, alimentary canal

16

17

18 **Summary statement:**

19

20 In this study, we provide the first evidence for the presence of cold-induced paracellular leak  
21 along the gut of the migratory locust, and that this leak is strongest in the mucosal to serosal  
22 direction.

23

24

25

26

## 27 **Abstract**

28 Chill-susceptible insects, like the migratory locust, often die when exposed to low temperatures  
29 from an accumulation of tissue damage that is unrelated to freezing (chilling injuries). Chilling injury is  
30 consistently associated with ion imbalance across the gut epithelia. It has recently been suggested that this  
31 imbalance is at least partly caused by a cold-induced disruption of epithelial barrier function. Here, we  
32 aim to test this hypothesis in the migratory locust (*L. migratoria*). First, chill tolerance was quantified by  
33 exposing locusts to -2°C for various durations and monitored for chill coma recovery time and survival  
34 24h post-cold exposure. Longer exposure times significantly increased recovery time and caused injury  
35 and death. Ion-selective microelectrodes were also used to determine the presence of cold-induced ion  
36 imbalance. We found a significant increase and decrease of hemolymph K<sup>+</sup> and Na<sup>+</sup> concentrations over  
37 time, respectively. Next, barrier failure along the gut was tested by monitoring the movement of an  
38 epithelial barrier marker (FITC-dextran) across the gut epithelia during exposure to -2°C. We found  
39 minimal marker movement across the epithelia in the serosal to mucosal direction, suggesting that locust  
40 gut barrier function remains generally conserved during chilling. However, when tested in the mucosal to  
41 serosal direction, we saw significant increases of FITC-dextran with chilling. This instead suggests that  
42 while cold-induced barrier disruption is present, it is likely unidirectional. It is important to note that these  
43 data reveal only the phenomenon itself. The location of this leak as well as the underlying mechanisms  
44 remain unclear and require further investigation.

45

## 46 Introduction

47 Chill susceptible insects are those that succumb to the negative effects of cooling at  
48 temperatures well above the freezing point of their extracellular fluids (Overgaard and  
49 MacMillan, 2017). When many ectothermic animals are chilled, they reach a temperature at  
50 which a state of neuromuscular paralysis (chill coma) occurs, known as chill coma onset  
51 temperature (CCO). Insects can remain in this reversible comatose state for the duration of a cold  
52 exposure in the lab and can often recover once the stressor (brief or mild cold) has been  
53 removed. The time taken to regain the ability to stand following chill coma is termed chill coma  
54 recovery time (CCRT) (Gibert et al., 2001; David et al., 1998). Both CCO and CCRT are  
55 regularly used as non-lethal means of quantifying chill susceptibility in various groups of insects,  
56 such as crickets (*Gryllus pennsylvanicus*), caterpillars (*Pringleophaga marioni*), fruit flies  
57 (*Drosophila melanogaster*), locusts (*Locusta migratoria*), and firebugs (*Pyrrhocoris apterus*)  
58 (Andersen et al., 2013; Andersen et al., 2017a; Chown and Klok, 1997; Coello Alvarado et al.,  
59 2015; Robertson et al., 2017). In the event of a particularly harsh or prolonged exposure, an  
60 accumulation of cold-induced tissue damage (chilling injuries) can occur (Coello Alvarado et al.,  
61 2015; Košťál et al., 2006; MacMillan and Sinclair, 2011a). Chilling injuries typically manifest as  
62 a loss of coordination, permanent limb paralysis, or mortality (Overgaard and MacMillan, 2017).  
63 Quantifying an insect's condition or survival following cold stress is therefore another common  
64 measure of chill tolerance, and can be quantified using a scoring system (e.g. as dead/alive, or a  
65 range of conditions from dead to alive) to indirectly measure the degree of injury sustained  
66 (Findsen et al., 2013; Overgaard and MacMillan, 2017). While each of these chill tolerance traits  
67 operate via distinct mechanisms, they have all been in some manner associated with a local or  
68 systemic loss of ion balance, suggesting that ionoregulatory failure may be a principal cause of

69 chill susceptibility (Armstrong et al., 2012; Bayley et al., 2018; Findsen et al., 2013; Košťál et al.,  
70 2006; MacMillan et al., 2015a; Robertson et al., 2017).

71 In insects, organismal ion homeostasis is under tight regulation by both the Malpighian  
72 tubules (MTs) and gut epithelia (MacMillan and Sinclair, 2011a). Briefly, the gut has three main  
73 regions (foregut, midgut, and hindgut), each with its own specialized functions. The foregut lies  
74 at the anterior margin of the gut and consists of flattened and undifferentiated cells consistent  
75 with the lack of absorption or secretion that takes place in the region (Chapman, 2013). Instead,  
76 the foregut generally acts as a passage through which food travels, although muscular breakdown  
77 and salivary digestion of the bolus can occur (Dadd, 1970). From the foregut, food travels to  
78 reach the remainder of the gut where it is digested (Engel and Moran, 2013; Naikhwah and  
79 O'Donnell, 2012). Cells along the midgut are actively involved in digestive enzyme production  
80 and secretion, acting as the primary site of digestion and nutrient, ion, and water absorption  
81 (Chapman, 2013; Yerushalmi et al., 2018). Following the midgut are the MTs, blind-ended tube-  
82 shaped diverticula of the gut that are somewhat analogous to the vertebrate kidneys (Chapman,  
83 2013). These tubules are one cell layer thick and contain a multitude of cation exchangers and  
84 pumps (Maddrell and O'Donnell, 1992; O'Donnell and Ruiz-Sanchez, 2015). Through these  
85 ionoregulatory pumps (e.g. V-ATPase, the proton pump that primarily energizes transport at the  
86 MTs) and channels, ions such as  $K^+$ ,  $Na^+$  and  $Cl^-$  are driven from the hemolymph to the tubule  
87 lumen. For instance,  $K^+$  is secreted into the tubule lumen which helps to maintain a low  $K^+$   
88 (generally 10-15 mM) environment that permits muscle function (Andersen et al., 2017a;  
89 Andersen et al., 2018; Djamgoz, 1987; Gerber and Overgaard, 2018; Harvey and Zerahn, 1972;  
90 Hoyle, 1953; Rheuben, 1972; Yerushalmi et al., 2018). These means of ionoregulation across the  
91 MTs promote an osmotic gradient that favours the movement of water and unwanted waste

92 products or toxins into the tubule lumen (secretion), producing primary urine (Maddrell and  
93 O'Donnell, 1992). Finally, the hindgut (composed of the ileum and rectum) is the most posterior  
94 region of the gut, and is the main site for the absorption of water and solutes (Phillips et al.,  
95 1987). Cell membranes along the intercellular spaces of the hindgut are rich in  $\text{Na}^+/\text{K}^+$ -ATPase,  
96 which generates high  $[\text{Na}^+]$  in the paracellular space that drives water across the hindgut  
97 epithelium via osmosis, permitting water reabsorption and production of a dry feces (Des  
98 Marteaux et al., 2018; Phillips, 1981; Wall and Oschman, 1970).

99 Through the continuous ionoregulatory actions of the alimentary canal, the hemolymph  
100 of most insects contains high and low concentrations of  $\text{Na}^+$  and  $\text{K}^+$ , respectively, at optimal or  
101 near-optimal thermal conditions (Engel and Moran, 2013; MacMillan et al., 2015b; Maddrell and  
102 O'Donnell, 1992). In cold conditions, however, the activity of ionoregulatory enzymes like  
103 V-ATPases and  $\text{Na}^+/\text{K}^+$ -ATPases is suppressed (Bayley et al., 2018; Hosler et al., 2000; Mandel  
104 et al., 1980; McMullen and Storey, 2008; Moriyama and Nelson, 1989; Yerushalmi et al., 2018).  
105 Over time, this temperature-induced suppression of transcellular ion transport often results in a  
106 net leak of hemolymph  $\text{Na}^+$  and water (which follows  $\text{Na}^+$  osmotically) to the gut lumen,  
107 effectively concentrating the  $\text{K}^+$  that remains in the hemolymph (MacMillan and Sinclair,  
108 2011b). Some intracellular  $\text{K}^+$  simultaneously leaking down its concentration gradient into the  
109 extracellular space worsens this problem (Andersen et al., 2017; MacMillan et al., 2014). As  $\text{K}^+$   
110 concentrations rise in the hemocoel (hyperkalemia), the gradient of  $\text{K}^+$  across the cell membrane  
111 is lost, and a marked depolarization in membrane potential occurs, eventually resulting in the  
112 activation of voltage-gated  $\text{Ca}^{2+}$  channels (Andersen et al., 2017a; Bayley et al., 2018;  
113 MacMillan et al., 2015a). The influx of  $\text{Ca}^{2+}$  that ensues is proposed to initiate a crippling  
114 cascade which causes a deterioration of cellular integrity, likely through apoptosis (Mattson and

115 Chan, 2003; Nicotera and Orrenius, 1998; Yi and Lee, 2011; Yi et al., 2007). Failure to maintain  
116 ion and water homeostasis in the cold can therefore ultimately result in organismal chilling injury  
117 or death. In turn, understanding the biochemical mechanisms underlying this failure is critical to  
118 understanding chill susceptibility. While a cold-induced failure of transcellular transport is one  
119 likely mechanism of chilling injury and is under active investigation, ions do not cross epithelia  
120 solely via transcellular pathways (Donohoe et al., 2000; MacMillan et al., 2016a; O'Donnell and  
121 Maddrell, 1983).

122         In addition to the active movement of ions and passive transport of solutes and water  
123 through cells (transcellular pathways; e.g. via channels), the gut also relies on the passive  
124 movement, or leak, of molecules through paracellular pathways between adjacent cells  
125 (Jonusaite et al., 2016; le Skaer et al., 1987). Septate junctions (SJs) are specialized cell-cell  
126 junctions analogous to vertebrate tight junctions that largely determine the permeability of these  
127 paracellular pathways (Jonusaite et al., 2016). Arthropod epithelia generally have two types of  
128 SJs: pleated and smooth. The former are typically observed in ectodermally-derived epithelia  
129 such as the foregut and hindgut, and are 2-3 nm wide, while smooth SJs are found in  
130 endodermally-derived tissues like the midgut, and are 5-20 nm wide (Jonusaite et al., 2016). To  
131 date, the majority of SJ studies has been conducted on *Drosophila*, including the identification of  
132 SJ types, associated proteins, and SJ influence in cold tolerance plasticity (Izumi and Furuse,  
133 2014; Jonusaite et al., 2016; MacMillan et al., 2017). Notably, flies acclimated to colder  
134 conditions are more cold tolerant than warm-acclimated flies and upregulate approximately 60%  
135 of genes encoding known or putative fly SJ proteins (MacMillan et al., 2016b). These cold-  
136 acclimated (10°C) flies also have reduced rates of paracellular leak of a fluorescent probe (FITC-  
137 dextran) from their gut lumen to their hemolymph, both before and during a cold stress,

138 compared to warm-acclimated (25°C) flies (MacMillan et al., 2017). Together, these studies  
139 suggest that cold exposure can cause increased rates of leak through the paracellular barriers, and  
140 that improvements in cold tolerance may be in-part related to an improved ability to maintain  
141 paracellular barriers. However, because flies were fed the probe for these experiments (and the  
142 gut was completely loaded with the probe upon cold exposure) the precise location of this leak  
143 along the gut and the mechanisms that drive it remain unclear, as does whether this a problem  
144 experienced by all insects, or just *D. melanogaster*.

145         Here, we investigate the effects of chilling on epithelial barrier integrity in a chill  
146 susceptible insect, the migratory locust (*Locusta migratoria*). As previously observed in  
147 *Drosophila*, we hypothesized that chilling disrupts septate junctions (SJs) in the locust gut and  
148 that this effect leads to paracellular leak across the gut epithelia. Due to the often  
149 temperature-sensitive nature of ionoregulatory enzymes, and their dense concentration along  
150 ionomotive epithelia, we also hypothesized that this disruption in barrier integrity is limited to  
151 transport-rich segments along the locust gut such as the midgut and hindgut. To address these  
152 hypotheses, we first confirmed that our locust colony is chill susceptible by measuring their  
153 survival and performance post-cold exposure. We then used the fluorescently-labelled marker,  
154 FITC-dextran to characterize directionality in cold-induced paracellular leak, and find that cold  
155 does induce paracellular leak through the gut epithelia of locusts, but surprisingly only in one  
156 direction.

157

## 158 **Methods**

### 159 *Experimental system*

160         All experiments were conducted using male and female adult locusts (*Locusta*

161 *migratoria*) aged 3-4 weeks post-final ecdysis. Locusts were obtained from a continuously  
162 breeding colony maintained at Carleton University in Ottawa, ON. This colony is reared under  
163 crowded conditions on a 16 h:8 h light:dark cycle at 30°C with 60% relative humidity (see  
164 Dawson et al., 2004). All animals had *ad libitum* access to a dry food mixture (oats, wheat bran,  
165 wheat germ, and powdered milk), and fresh wheat clippings supplied three times per week.

166

### 167 *Chill coma recovery time and survival*

168 The degree of chill susceptibility of the locust colony was quantified using both their chill  
169 coma recovery time (CCRT) and the degree of injury/mortality 24 h following exposure to -2°C.  
170 On the day of the experiment, locusts were collected from the colony, sexed by eye, and  
171 individually placed into 50 mL polypropylene tubes. These tubes were sealed using lids with  
172 small holes to allow access to air for the duration of the experiment. Excluding controls, all  
173 locusts were suspended using a Styrofoam rig in a cooling bath (Model AP28R-30, VWR  
174 International, Radnor, USA) containing a circulating ethylene glycol:water mix (3:2) preset to  
175 20°C and cooled to -2°C at a rate of -0.20°C min<sup>-1</sup>. Both bath temperature and locust internal  
176 body temperature were monitored; the former via internal probes, and the later via inserted type-  
177 K thermocouples (TC-08 interface; *PicoLog* software version 5.25.3) located at the junction of  
178 the head and thorax of representative locusts (that were not used further in the experiments).  
179 Locusts were then left undisturbed for 2, 6, 24, or 48 h upon which arbitrarily selected groups of  
180 locusts were removed from the cold and returned to room temperature (23°C). In order to  
181 monitor CCRT, insects were removed from their tubes and gently placed on the surface of a table  
182 and observed for the time taken to recover from chill coma. Animals were stimulated by gentle  
183 puffs of air from a transfer pipette every minute and were marked as having fully recovered



184 when standing on all six limbs. Observation time was limited to 60 min; any locusts not meeting  
185 this criterion were marked as having not recovered.

186 After 60 min, the locusts were returned to their respective tubes along with a dry food  
187 mixture (oats, wheat bran, wheat germ, and powdered milk) and water (supplied in  
188 microcentrifuge tubes with cotton) and left for 24 h at room temperature (23°C). An assessment  
189 of 24 h survival post-cold exposure was performed using a scoring system of 0 to 5, similar to  
190 that described by MacMillan et al. (2014). Briefly, scores were defined as follows: 0: no  
191 movement observed (i.e. dead); 1: limb movement (slight leg and or head twitching); 2: greater  
192 limb movement, but unable to stand; 3: able to stand, but unable or unwilling to walk or jump; 4:  
193 able to stand, walk, and or jump, but lacks coordination; and 5: movement restored pre-exposure  
194 levels of coordination.

195

#### 196 *Quantification of serosal to mucosal paracellular leak and ion imbalance*

197 To measure paracellular permeability in the gut epithelia of locusts, we monitored the  
198 movement of a fluorescently-labeled molecule in both the serosal (hemolymph) to mucosal  
199 (lumen) direction, and the mucosal to serosal direction. All experiments used FITC-dextran  
200 (3-5kDa, Sigma Aldrich, St. Louis, USA) a commonly used probe for determining paracellular  
201 permeability in both invertebrate and vertebrate models such as fruit flies (*D. melanogaster*), rats  
202 (*Rattus norvegicus domesticus*), and zebra fish (*Danio rerio*) (see MacMillan et al., 2017;  
203 Condetto et al., 2014; Bagnat et al., 2007).

204 Experiments conducted in the serosal to mucosal direction (from the hemolymph to the  
205 gut lumen) were done both to identify the presence of leak across the gut epithelia and isolate the  
206 area across which leak occurred. Protocols for this novel leak assay were developed through

207 preliminary trials. In the final assay, FITC-dextran was dissolved in locust saline (in mmol l<sup>-1</sup>:  
208 140 NaCl, 8 KCl, 2.3 CaCl<sub>2</sub> Dihydrate, 0.93 MgCl<sub>2</sub> Hexahydrate, 1 NaH<sub>2</sub>PO<sub>4</sub>, 90 sucrose, 5  
209 glucose, 5 trehalose, 1 proline, 10 HEPES, pH 7.2) resulting in a final FITC-dextran  
210 concentration of 3.84 x 10<sup>-3</sup> M (selected based on standard curves from the preliminary trials).  
211 Using a 25 µL Hamilton syringe, 20 µL of this solution was injected into the hemocoel ventrally  
212 at the junction of the thorax and first abdominal segment of locusts. Pilot experiments revealed  
213 that neither the 20 µL injection nor the FITC-dextran itself impacted locust performance or  
214 survival (survival for control locusts with and without FITC-dextran injection was scored as 5).  
215 Following the protocol for CCRT (outlined above), animals were suspended in a cooling bath  
216 preset to 20°C and cooled to -2°C at a rate of -0.2°C min<sup>-1</sup>. Insects were then held at -2°C (or  
217 room temperature for controls) and left undisturbed for 2, 6, 24, or 48 h.

218 Locusts were individually removed from the cooling bath and dissected within 15 min of  
219 their target cold exposure duration for tissue collection. Animals were sacrificed by decapitation  
220 before removing all limbs and wings. The thorax and abdomen (containing the internal organs)  
221 were placed in a petri dish lined with silicone elastomer (Sylgaard 184 Silicone Elastomer Kit,  
222 Dow Chemical, Midland, USA) and containing locust saline. A longitudinal incision was made  
223 in the anterior to posterior direction along the ventral side to expose the gut. With the body wall  
224 pinned back, the tracheae and Malpighian tubules were then cleared away to access the gut  
225 tissue. The gut was then cut into three segments (anterior, central, posterior) based on our ability  
226 to carefully isolate these segments rather than pre-determined anatomical divisions (see Fig. 2A).  
227 Briefly, the anterior segment was defined as the foregut to the anterior midgut caeca, the central  
228 segment as the posterior midgut caeca to the midgut-hindgut junction, and the posterior segment  
229 as the midgut-hindgut junction to the rectum. To avoid excessive leak of gut contents during

230 collection, segments were gently pinched with dissecting forceps at both ends before excision.  
231 Upon removal, segments were washed briefly in saline (while retaining their contents) to remove  
232 any excess dextran-saturated hemolymph, and placed in microcentrifuge tubes containing  
233 500  $\mu$ L of locust saline. Samples were subsequently homogenized (OMNI International Tissue  
234 Master 125 120 V, Kennesaw, USA; approximately 3 min), sonicated (Qsonica Sonicators  
235 Model CL-188, Newton, USA; 3 x 5 s bursts with 10 s rests), and centrifuged for 5 min at 10,000  
236  $\times$  g. A 100  $\mu$ L aliquot of the resulting supernatant was collected and transferred to a black 96-  
237 well plate for fluorescence spectrophotometry (Ex: 485 nm, Em: 528 nm; BioTek Cytation 5  
238 Imaging Reader, Winooski, USA). Concentrations of FITC-dextran in the samples were  
239 determined by reference to a standard curve of FITC-dextran in locust saline, and control  
240 samples confirmed that tissues from locusts that were not injected with the probe had negligible  
241 fluorescence (see Fig. 2B and D).

242 Because little FITC-dextran appeared in the gut samples (see Results), hemolymph  
243 extraction experiments were performed on separate locusts over identical exposures to determine  
244 how much FITC-dextran was being lost from the hemolymph over time. Similar to the above  
245 protocols, a new set of locusts were injected with the FITC-dextran solution and suspended at -  
246 2°C for 2, 6, 24, or 48 h in a circulating cooling bath, while controls were held at room  
247 temperature. After their designated exposures, hemolymph samples were collected using  
248 methods adapted from Findsen et al. (2013). Briefly, locusts were pricked dorsally using a  
249 dissecting probe at the junction of the head and thorax before using a 50  $\mu$ L capillary tube to  
250 collect the hemolymph (as described for hemolymph ion measurements). A 2  $\mu$ L aliquot of  
251 hemolymph was pipetted into 96-well plates (Corning Falcon Imaging Microplate; black/clear  
252 bottom), diluted 50-fold with saline, and analyzed for FITC-dextran content via fluorescence

253 spectrophotometry. Pilot experiments showed no interference from the saline when measuring  
254 fluorescence. To maximize use of the large volumes of available hemolymph, these locusts were  
255 also used to collect data on hemolymph ion balance over time.

256 An additional 10  $\mu$ L of hemolymph from each animal was collected using a 50  $\mu$ L  
257 capillary tube. Samples were promptly vortexed and flash frozen in liquid nitrogen to avoid  
258 coagulation of the hemolymph and stored at  $-80^{\circ}\text{C}$  until experiments. All samples were vortexed  
259 once again prior to testing. Hemolymph  $\text{Na}^{+}$  and  $\text{K}^{+}$  concentrations were measured using ion-  
260 selective borosilicate microelectrodes (TWI150-4, World Precision Instruments, Sarasota, USA).  
261 No interference from the FITC-dextran was found when measuring ions. The ion content of  
262 hemolymph both with and without FITC-dextran was measured in control (room temperature)  
263 locusts across 48h, and statistical analysis revealed no significant differences in ion  
264 concentrations between the two groups (Linear model,  $F_{1, 10} = 0.302$ ,  $P = 0.594$ ). Our  
265  $\text{Na}^{+}$ -selective microelectrodes were constructed using 100 mM NaCl backfill solution and  $\text{Na}^{+}$   
266 ionophore II cocktail A (Sigma Aldrich), while  $\text{K}^{+}$  selective microelectrodes contained 100 mM  
267 KCl backfill solution and  $\text{K}^{+}$  ionophore I cocktail B (Sigma Aldrich). Microelectrodes were  
268 calibrated using standards of 10 mM and 100 mM of NaCl or KCl (osmolality adjusted with  
269 LiCl) for their respective measurement. These standards were also used to calculate the ion  
270 concentration in samples of hemolymph from the obtained voltage measurements using the  
271 following equation:

$$272 \quad C_f = C_L \cdot 10^{\Delta V/S} \quad (1)$$

273 where  $C_f$  is the final concentration in mM,  $C_L$  is the concentration (in mM) of the lowest standard  
274 used for the data point of interest,  $\Delta V$  is the difference (mV) between the sample of interest and  
275 the lowest standard, and  $S$  is the slope (the difference in mV between the two standards). Only

276 microelectrodes with a slope between 50 and 60 mV (close to the expected Nernst slope of 58  
277 mV) were used for all experiments ( $\text{Na}^+$ :  $51.2 \pm 0.1$ ;  $\text{K}^+$   $55.5 \pm 0.4$ ).

278

### 279 *Measuring paracellular leak in fed locusts*

280 Hemolymph extractions were also used (on a separate set of locusts) to measure leak  
281 across the gut epithelia in the mucosal to serosal direction. Looking back on the literature, we  
282 noticed that experiments using models such as mosquitos (*Aedes aegypti* and *Anopheles*  
283 *gambiae*) and rats (*Rattus norvegicus domestica*) administered FITC-dextran orally to test for  
284 paracellular leak (Condette et al., 2014; Edwards and Jacobs-Lorena, 2000; Pantzar et al., 1993).  
285 To test whether the lack of FITC-dextran movement in the serosal to mucosal direction was due  
286 to this key difference in methodology, we took a different approach. Instead of FITC-dextran  
287 injections, we fed locusts a mixture of dry food (oats, wheat bran, wheat germ, and powdered  
288 milk) saturated with a solution of FITC-dextran in water ( $9.6 \times 10^{-4}$  M) for 24 h prior to  
289 experiments. Pilot experiments confirmed the presence of FITC-dextran throughout the  
290 alimentary canal the following day. Similar to experiments in the opposite direction, all animals  
291 were exposed to  $-2^\circ\text{C}$  for 2, 6, 24, or 48 h. Hemolymph was sampled and analyzed as above  
292 following removal from the cold.

293

### 294 *2.2.6 Data Analysis*

295 All data, excluding concentrations of FITC-dextran found in the gut (*in vivo* FITC-  
296 dextran injection experiments; outlined below), were analyzed using linear models (i.e. one- or  
297 two-way ANOVAs) in R Studio version 1.2.1335 (<https://www.rstudio.com>). The effects of time  
298 in the cold on gut leakiness (quantified by FITC-dextran movement) were analyzed using a linear

299 mixed effects model via the lmer() function in R (lme4 and lmerTest packages for R). Time and  
300 segment were treated as fixed effects, while locust sex (*in vivo* FITC-dextran injection  
301 experiments) was treated as a random effect to account for variability in locust gut leakiness per  
302 individual or sex. All data were analyzed with time as both a continuous and categorical factor,  
303 however, the outcomes of these two approaches were identical. As such, all results presented in  
304 this section treat time as a continuous factor. The level of statistical significance was 0.05 for all  
305 analyses, while all additional values presented are mean  $\pm$  standard error.

306

## 307 **Results**

### 308 *Chill coma recovery time and injury following chilling*

309 The chill susceptibility of our locust colony was confirmed by measuring chill coma  
310 recovery time and scoring injury/survival of locusts 24 h post-cold exposure. After 2 h of cold  
311 exposure, all animals recovered from chill coma to standing position (CCRT) within 10-18 min.  
312 However, recovery time significantly increased as exposure times grew longer (Fig. 1A; Linear  
313 model,  $F_{1, 22} = 31.3$ ,  $P < 0.001$ ). This trend persisted until the last time point (48 h at  $-2^{\circ}\text{C}$ ), at  
314 which point no locusts recovered the ability to stand within 60 min. Similarly, survival rates  
315 decreased with longer cold exposures, leading to nearly 100% mortality after 48 h at  $-2^{\circ}\text{C}$  (Fig.  
316 1B; Linear model,  $F_{1, 38} = 199$ ,  $P < 0.001$ ).

317

### 318 *Hemolymph ion concentrations*

319 Ion selective microelectrodes were used to determine the effects of cold exposure on  
320 extracellular ion balance over the course of our experiments. While the concentration of  $\text{Na}^+$  in

321 the hemolymph decreased significantly as time at  $-2^{\circ}\text{C}$  increased up until approximately 24 h  
322 (Fig. 1D; Linear model,  $F_{1, 23} = 10.1$ ,  $P = 0.004$ ), hemolymph  $\text{K}^{+}$  concentrations significantly  
323 increased, doubling from 11.8 mM to 23.3 mM over 48 h at  $-2^{\circ}\text{C}$  (Fig. 1C; Linear model,  $F_{1, 23} =$   
324 27.8,  $P < 0.001$ ).

325

### 326 *Serosal to mucosal leak*

327 To quantify the presence of paracellular leak across the gut epithelia in the cold (from the  
328 hemocoel into the gut), samples were taken from each gut segment (Fig. 2A, anterior, central,  
329 and posterior) and analyzed for fluorescent content following marker injection. Interestingly,  
330 while FITC-dextran concentrations significantly increased in the gut over time (Fig. 2B; Linear  
331 model,  $F_{1, 77} = 7.85$ ,  $P = 0.006$ ), less than 1% of the total injected marker appeared within the gut  
332 after 48 h in the cold. Using summary data from both the gut leak assay ( $0.019 \pm 0.003$  mg/mL)  
333 and hemolymph extraction experiments (following section;  $2.05 \pm 0.279$  mg/mL), we estimate  
334 that approximately 0.93% of total FITC-dextran injected into the hemolymph leaked across the  
335 gut epithelia into the lumen during the entire 48 h cold exposure. This method also made it  
336 possible for us to isolate potential sites of barrier loss along the gut. However, in addition to the  
337 minute movement of FITC-dextran over time, there were no significant differences in marker  
338 concentration among the three gut segments (Linear model,  $F_{2, 77} = 1.76$ ,  $P = 0.179$ ). Similarly,  
339 no significant interaction was found between the time spent at  $-2^{\circ}\text{C}$  and the segment type (Linear  
340 model,  $F_{2, 77} = 1.57$ ,  $P = 0.214$ ). Finally, total concentrations of FITC-dextran found in the gut  
341 did not significantly differ between treatment and control locusts at 24 h (Fig. 2C; Linear model,  
342  $F_{4, 1} = 0.531$ ,  $P = 0.758$ ). There was, however, a significant difference between the total

343 concentration of FITC-dextran sampled at 0 h and 24 h in both treatments (Linear model,  $F_{1, 11} =$   
344 25.4,  $P < 0.001$ ).

345 Loss of marker from the hemolymph was investigated to corroborate levels of cold-  
346 induced leak into the gut and to determine whether our locusts were capable of metabolizing the  
347 probe. There was a significant loss of FITC-dextran from the hemolymph over time, both in the  
348 cold and at room temperature (Fig. 2D; Linear model,  $F_{1, 39} = 5.26$ ,  $P = 0.027$ ). However, there  
349 was no significant difference in marker movement between the two treatment groups (Linear  
350 model,  $F_{1, 39} = 0.142$ ,  $P = 0.708$ ). We also observed no significant interaction between marker  
351 concentration over time in the cold and room temperature conditions (Linear model,  $F_{1, 39} =$   
352 0.138,  $P = 0.712$ ).

353

#### 354 *Mucosal to serosal leak*

355 Traditionally, studies examining paracellular leak of FITC-dextran and other large  
356 markers like inulin involve the oral administration of probes to the animals, which is in stark  
357 contrast to our serosal to mucosal (probe injection) approach. These differences in methods may  
358 account for our initial finding that paracellular barriers are maintained in the cold (at least in  
359 locusts). To address this possibility, we again examined cold-induced leak, however, this time in  
360 the mucosal to serosal direction. Locusts were fed a dry food mixture saturated with water  
361 containing a fixed concentration of FITC-dextran and sampled for marker content. Unlike the  
362 minimal FITC-dextran leak that occurred in the serosal to mucosal direction, these experiments  
363 yielded a significant and near linear increase in hemolymph FITC-dextran concentration over  
364 time in the cold (Fig. 3; Linear model,  $F_{1, 44} = 10.8$ ,  $P = 0.002$ ). Finally, significant differences  
365 were also observed between treatment groups (Linear model,  $F_{1, 44} = 9.40$ ,  $P = 0.004$ ). There was



366 approximately a 15-fold difference in hemolymph FITC-dextran levels between control locusts  
367 and those that spent 48 h at -2°C.

368

## 369 **Discussion**

370 Chill susceptible insects experience adverse effects of chilling at low temperatures that  
371 occur in the absence of ice formation. Consequences of cold exposure for these insects, like chill  
372 coma and tissue damage, are consistently associated with a disruption of ion and water balance  
373 (Overgaard and MacMillan, 2017). Although temperature effects on active ion transport  
374 processes are likely critical drivers of organismal failure, another potential contributor is cold-  
375 induced deterioration of paracellular barrier components known as septate junctions (SJs). In this  
376 study, we provide the first evidence for the presence of unidirectional cold-induced paracellular  
377 leak. To our knowledge, this is also the first evidence of paracellular leak in cold-exposed insects  
378 other than *Drosophila*. Our findings provide additional correlative evidence of a role for  
379 epithelial barrier function as a contributing factor in insect chill tolerance.

380 Similar to trends observed in *Drosophila*, we predicted that a large and rapid increase in  
381 gut FITC-dextran concentration (i.e. serosal to mucosal leak) would occur over time in the cold  
382 (MacMillan et al., 2017). However, when each gut segment was analysed for marker content, we  
383 found that cold stress induced minimal leak from the hemolymph into the gut (Fig. 2B). Even  
384 more striking was the lack of difference found between control and cold exposed locusts when  
385 the total amount of FITC-dextran within the gut at 24 h was compared (Fig. 2C). These results  
386 therefore suggest that a slight leak occurs in the serosal to mucosal direction, however, it is not  
387 temperature sensitive. Similarly, we also observed no difference between the amount of  
388 FITC-dextran in the hemolymph in the cold and at room temperature (Fig. 2D). It is important to

389 note that while we saw decreasing levels of FITC-dextran from the hemolymph overall, the  
390 majority of the injected marker was retained in the hemocoel after a prolonged period of time.  
391 Such FITC-dextran retention within the hemolymph (whether through a lack of or minimal  
392 presence of marker degradation) has also been observed in vertebrate models like rats (*Ratticus*  
393 *norvegicus domestica*), as well as in invertebrate models like the plant bug (*Lygus hesperus*),  
394 lepidopterans (*Malacosoma disstria*, *Manduca sexta*, *Orgyia leucostigma*, and *Orgyia*  
395 *pseudotsugata*), and orthopterans (*Schistocerca americana*, *Melanoplus sanguinipes*, and  
396 *Phoetaliotes nebrascensis*; Barbehenn and Martin, 1995; Habibi et al., 2002; Nejdfor et al.,  
397 2000). Based on this evidence, we excluded FITC-dextran metabolism as a plausible explanation  
398 for our nominal marker movement, and remain confident that dextran is a good marker of  
399 paracellular permeability.

400         The lack of marker movement we observed is very small when compared to results in  
401 *Drosophila*, where even cold-acclimated (and more cold tolerant) flies exhibited 10.5-fold  
402 increases in hemolymph FITC-dextran levels in the cold (Andersen et al., 2017b; MacMillan et  
403 al., 2017). While in lesser concentrations, other macromolecules such as inulin (approx. 5000  
404 kDa) have also been shown to leak across the gut and into the hemolymph in fifth instar desert  
405 locusts (*S. gregaria*; desert locust) (Zhu et al., 2001). Furthermore, areas along the midgut of  
406 larval *Aedes aegypti* (yellow fever mosquito) are permeable to FITC-dextran as large as 148 kDa  
407 (Edwards and Jacobs-Lorena, 2000). This permeability to large molecules is not a phenomenon  
408 limited to invertebrates. On the contrary, numerous intestinal permeability experiments have  
409 been done in vertebrate models such as mice and rats using FITC-dextran – the vast majority of  
410 which support the ability of FITC-dextran to diffuse across areas of the gut (Pantzar et al., 1993;  
411 Woting and Blaut, 2018). While our findings clearly differ from those previously reported, they

412 are consistent with the inability for FITC-dextran to permeate the locust rectal wall (Gerber and  
413 Overgaard, 2018). In this case, however, gut preparations were exposed to a short-term cold  
414 stress. Exposure to more prolonged bouts of cold may yield different results. A plausible  
415 explanation for this lack of marker movement in our locusts may thus lie in the structure of  
416 FITC-dextran itself. Permeability across the paracellular pathway is largely determined by  
417 septate junctions (SJs), which span an intercellular space of 50-200 Å (5-20 nm; Jonusaite et al.,  
418 2016). By comparison, the 4 kDa FITC-dextran used in this study is approximately 14 Å and  
419 should therefore be able to cross through this pathway unhindered. However, as FITC-dextran is  
420 bulky, polar, and uncharged, it may be physically incapable of permeating the paracellular  
421 pathway in our locusts, even under cold stress (Matter and Balda, 2003).

422         While our initial experiment examined movement in the serosal to mucosal direction to  
423 isolate gut leak, it is far more common practice to assess leak via the opposite route. In addition  
424 to *Drosophila*, studies spanning an array of models from kissing bugs (*Rhodnius prolixus*) to  
425 mice (*Mus musculus*) and killifish (*Fundulus heteroclitus*) have documented the movement of  
426 various markers through the paracellular pathways in the mucosal to serosal direction across gut  
427 epithelia (Andersen et al., 2017b; le Skaer et al., 1987; MacMillan et al., 2017; O'Donnell and  
428 Maddrell, 1983; O'Donnell et al., 1984; Wood and Grosell, 2012; Woting and Blaut, 2018). The  
429 lack of FITC-dextran movement in the serosal to mucosal direction may therefore be attributed  
430 to the route of administration.

431         To distinguish between the presence of strictly unidirectional leak and a lack of leak, we  
432 fed locusts a dry food-dextran mixture 24 h prior to cold exposure. In stark contrast to our  
433 previous results, we observed a significant increase in hemolymph dextran concentrations over  
434 time at -2°C, resulting in a near 18- and 32-fold rise in total FITC-dextran levels after 24 h and

435 48 h in the cold, respectively (Fig. 3). Interestingly, the former increase of FITC-dextran under  
436 cold stress was similar to that seen across 24 h in FITC-dextran-fed *Drosophila*, where a  
437 10.5-fold increase in marker concentration was observed (MacMillan et al., 2017). Meanwhile,  
438 in the opposite direction (serosal to mucosal), leak across the gut of our locusts resulted only in a  
439 2-fold increase in the cold relative to concentrations in animals prior to cold exposure (Fig. 2B).  
440 These data therefore suggest that cold-induced leak does occur in locusts, but occurs  
441 unidirectionally across the gut epithelia during cold stress.

442         It is well-documented that cold exposure causes not only a loss of ion and water balance,  
443 but also a depolymerization of cytoskeletal components such as actin (Belous, 1992; Callaini et  
444 al., 1991; Des Marteaux et al., 2018; Kayukawa and Ishikawa, 2009; Kim et al., 2006). The actin  
445 cytoskeleton is critical to ion transport regulation, often acting as an anchor point to which  
446 transport proteins attach on both the basolateral and apical borders of epithelial cells (Cantiello,  
447 1995a; Cantiello et al., 1991; Janmey, 1998; O'Donnell, 2017; Sasaki et al., 2014). Damage to  
448 the actin cytoskeleton can therefore create a cascade of detrimental effects within an organism.  
449 For instance, disruptions in the actin cytoskeleton have been shown to inactivate K<sup>+</sup> channels in  
450 human melanoma cells (Cantiello et al., 1993). Similarly, in rat kidneys, failure of the  
451 cytoskeletal system stimulates Na<sup>+</sup>/K<sup>+</sup>-ATPase activity such that it has an increased affinity for  
452 Na<sup>+</sup> (Cantiello, 1995b). Such a disruption of ionoregulation could in turn directly compromise  
453 water and Na<sup>+</sup> reabsorption within insects - especially in the cold.

454         In addition to its role in regulating ion transport, actin has also been linked to the  
455 maintenance of tissue integrity as a key component of SJ structure (Lane and Flores, 1988;  
456 Woods and Bryant, 1991). As SJs are typically located on the apical borders of epithelial cells,  
457 cold-induced disruption in SJs, as seen with *Drosophila* (MacMillan et al., 2017), may be caused

458 by cold-induced disassembly of the cytoskeletal network (Belous, 1992; Harvey and Zerahn,  
459 1972). Coupled with a failure of ion transporters and channels on the apical borders, such a loss  
460 of tissue integrity could lead to a functionally “funnel-like” cavity along the mucosal side of gut  
461 epithelia. This further deterioration of barrier integrity in the cold may exacerbate the damage  
462 and leak of gut contents into the hemocoel and contribute to the cascade of events which result in  
463 the damage and death typically seen in cold-exposed insects. It is important to note that the  
464 surface of gut epithelial cells may differ in transport and SJ properties, potentially resulting in  
465 only a section or sections along the gut vulnerable to cold-induced structural damage (Cioffi,  
466 1984; Harvey and Zerahn, 1972). Nevertheless, such structural deterioration along the mucosal  
467 side of the gut epithelia may therefore account for why FITC-dextran, despite its large and bulky  
468 composition, is able to move from the gut lumen into the hemocoel, but not in the opposite  
469 direction. It remains entirely unclear whether this unidirectional leak occurs under other  
470 conditions of stress and in other animal models.

471 In conclusion, locusts, like *D. melanogaster*, experience cold-induced leak from the gut  
472 when exposed to low temperatures. In locusts (and possibly other insects), this leak is  
473 unidirectional across the gut and may be attributed to a cold-induced deterioration of paracellular  
474 barrier integrity along the mucosal surface of the gut. While this study presents clear evidence  
475 supporting a directionality of cold-induced leak along the gut, the precise location of this leak  
476 and the mechanisms that drive it, unfortunately, remain unclear. To work toward filling these  
477 gaps in knowledge, we propose further investigation of the effects of cold exposure on the locust  
478 gut be conducted in isolated *ex vivo* gut sac preparations (Hanrahan et al., 1984). Such an  
479 experimental setup would allow each gut region to be more carefully assayed for the presence of  
480 cold-induced damage and/or leak. We found that there is the wide variability in the degree of

481 paracellular barrier failure observed among individual cold-exposed locusts (Fig. 3). If barrier  
482 failure is central to the progression of chilling injury, these differences in individual leak rates  
483 may closely reflect survival outcomes (Fig 1B). Combining methods of assessing survival and  
484 FITC-dextran movement (i.e. hemolymph extractions) may therefore yield useful information  
485 regarding this individual variation, and perhaps a new method for measuring and explaining  
486 insect chill susceptibility.

487

## 488 **Acknowledgements**

489 The authors wish to thank Jeffery Dawson, Jessica Forrest, and Jayne Yack for providing  
490 constructive feedback used to improve the manuscript; Jeffery Dawson for supplying locusts and  
491 the tools used to construct experimental equipment; Marshall Ritchie and Charlene Mae Herrera  
492 for taking care of the locust colony during this time.

493

## 494 **Competing Interests**

495 The authors declare no competing interests.

496

## 497 **Funding**

498 This work was supported by a Natural Sciences and Engineering Research Council (NSERC)  
499 Discovery Grant to H.M. (RGPIN-2018-05322).

500

## 501 Data Availability

502 All data is provided as a supplementary file for review and the same file will be uploaded to a  
503 data repository (e.g. Dryad) should the manuscript be accepted for publication.

## 504 References

- 505
- 506 **Andersen, J. L., Findsen, A. and Overgaard, J.** (2013). Feeding impairs chill coma recovery  
507 in the migratory locust (*Locusta migratoria*). *J. Insect Physiol.* **59**, 1041–1048.
- 508 **Andersen, M. K., Folkersen, R., MacMillan, H. A. and Overgaard, J.** (2017a). Cold-  
509 acclimation improves chill tolerance in the migratory locust through preservation of ion  
510 balance and membrane potential. *J. Exp. Biol.* **220**, 487–496.
- 511 **Andersen, M. K., MacMillan, H. A., Donini, A. and Overgaard, J.** (2017b). Cold tolerance of  
512 *Drosophila* species is tightly linked to epithelial K<sup>+</sup> transport capacity of the Malpighian  
513 tubules and rectal pads. *J. Exp. Biol.* **220**, 4261–4269.
- 514 **Andersen, M. K., Jensen, N. J. S., Robertson, R. M. and Overgaard, J.** (2018). Central  
515 nervous system shutdown underlies acute cold tolerance in tropical and temperate  
516 *Drosophila* species. *J. Exp. Biol.* **221**, jeb179598.
- 517 **Armstrong, G. A. B., Rodríguez, E. C. and Meldrum Robertson, R.** (2012). Cold hardening  
518 modulates K<sup>+</sup> homeostasis in the brain of *Drosophila melanogaster* during chill coma. *J.*  
519 *Insect Physiol.* **58**, 1511–1516.
- 520 **Bagnat, M., Cheung, I. D., Mostov, K. E. and Stainier, D. Y. R.** (2007). Genetic control of  
521 single lumen formation in the zebrafish gut. *Nat. Cell Biol.* **9**, 954–960.
- 522 **Barbehenn, R. V and Martin, M. M.** (1995). Peritrophic envelope permeability in herbivorous  
523 insects. *J. Insect Physiol.* **41**, 303–311.
- 524 **Bayley, J. S., Winther, C. B., Andersen, M. K., Grønkjær, C., Nielsen, O. B., Pedersen, T.**  
525 **H. and Overgaard, J.** (2018). Cold exposure causes cell death by depolarization-mediated  
526 Ca<sup>2+</sup> overload in a chill-susceptible insect. *Proc. Natl. Acad. Sci.* **115**, E9737–E9744.
- 527 **Belous, A. M.** (1992). The role of regulatory systems modulating the state of cytoskeletal  
528 proteins under the temperature and osmotic effects. In *Problems Cryobiol*, pp. 3–13.
- 529 **Callaini, G., Dallai, R. and Riparbelli, M. G.** (1991). Microfilament distribution in cold-treated  
530 *Drosophila* embryos. *Exp. Cell Res.* **194**, 316–321.
- 531 **Cantiello, H. F.** (1995a). Role of the actin cytoskeleton on epithelial Na<sup>+</sup> channel regulation.  
532 *Kidney Int.* **48**, 970–984.
- 533 **Cantiello, H. F.** (1995b). Actin filaments stimulate the Na<sup>+</sup>-K<sup>+</sup>-ATPase. *Am. J. Physiol. Physiol.*  
534 **269**, F637–F643.
- 535 **Cantiello, H. F., Stow, J. L., Prat, A. G. and Ausiello, D. S.** (1991). Actin filaments regulate  
536 epithelial Na<sup>+</sup> channel activity. *Am. J. Physiol. Cell Physiol.* **261**, C882–C888.
- 537 **Cantiello, H. F., Prat, A. G., Bonventre, J. V., Cunningham, C. C., Hartwig, J. H. and**  
538 **Ausiello, D. A.** (1993). Actin-binding protein contributes to cell volume regulatory ion  
539 channel activation in melanoma cells. *J. Biol. Chem.* **268**, 4596–4599.
- 540 **Chapman, R. F.** (2013). Alimentary canal, digestion and absorption. In *The Insects: Structure*  
541 *and Function*, pp. 38–68. Oxford University Press (OUP).
- 542 **Chown, S. L. and Klok, C. J.** (1997). Critical thermal limits, temperature tolerance and water  
543 balance of a sub-Antarctic caterpillar, *Pringleophaga marioni* (Lepidoptera: Tineidae). *J.*



- 544 *Insect Physiol.* **43**, 685–694.
- 545 **Cioffi, M.** (1984). Comparative ultrastructure of arthropod transporting epithelia. *Amer. Zool.*  
546 **24**, 139–156.
- 547 **Coello Alvarado, L. E., MacMillan, H. A. and Sinclair, B. J.** (2015). Chill-tolerant *Gryllus*  
548 crickets maintain ion balance at low temperatures. *J. Insect Physiol.* **77**, 15–25.
- 549 **Condette, C. J., Khorsi-Cauet, H., Morlière, P., Zabijak, L., Reygnier, J., Bach, V. and Gay-**  
550 **Quéheillard, J.** (2014). Increased gut permeability and bacterial translocation after chronic  
551 chlorpyrifos exposure in rats. *PLoS One* **9**, e102217.
- 552 **Dadd, R. H.** (1970). Digestion in Insects. In *Chemical Zoology Vol. 5: Arthropoda, Part 1*, pp.  
553 117–140.
- 554 **David, R. J., Gibert, P., Pla, E., Petavy, G., Karan, D. and Moreteau, B.** (1998). Cold stress  
555 tolerance in *Drosophila*: Analysis of chill coma recovery in *D. melanogaster*. *J. Therm.*  
556 *Biol.* **23**, 291–299.
- 557 **Dawson, J. W., Leung, F. H. and Robertson, M. R.** (2004). Acoustic startle/escape reactions in  
558 tethered flying locusts: Motor patterns and wing kinematics underlying intentional steering.  
559 *J. Comp. Physiol. A.* **190**, 581–600.
- 560 **Des Marteaux, L. E., Stinziano, J. R. and Sinclair, B. J.** (2018). Effects of cold acclimation on  
561 rectal macromorphology, ultrastructure, and cytoskeletal stability in *Gryllus pennsylvanicus*  
562 crickets. *J. Insect Physiol.* **104**, 15–24.
- 563 **Djamgoz, M. B. A.** (1987). Insect muscle: Intracellular ion concentrations and mechanisms of  
564 resting potential generation. *J. Insect Physiol.* **33**, 287–314.
- 565 **Donohoe, P. H., West, T. G. and Boutilier, R. G.** (2000). Factors affecting membrane  
566 permeability and ionic homeostasis in the cold-submerged frog. *J. Exp. Biol.* **203**, 405–414.
- 567 **Edwards, M. J. and Jacobs-Lorena, M.** (2000). Permeability and disruption of the peritrophic  
568 matrix and caecal membrane from *Aedes aegypti* and *Anopheles gambiae* mosquito larvae.  
569 *J. Insect Physiol.* **46**, 1313–1320.
- 570 **Engel, P. and Moran, N. A.** (2013). The gut microbiota of insects - diversity in structure and  
571 function. *FEMS Microbiol. Rev.* **37**, 699–735.
- 572 **Findsen, A., Andersen, J. L., Calderon, S. and Overgaard, J.** (2013). Rapid cold hardening  
573 improves recovery of ion homeostasis and chill coma recovery time in the migratory locust,  
574 *Locusta migratoria*. *J. Exp. Biol.* **216**, 1630–1637.
- 575 **Gerber, L. and Overgaard, J.** (2018). Cold tolerance is linked to osmoregulatory function of  
576 the hindgut in *Locusta migratoria*. *J. Exp. Biol.* **221**, jeb173930.
- 577 **Gibert, P., Moreteau, B., Pétavy, G., Karan, D. and David, J. R.** (2001). Chill coma  
578 tolerance, a major climatic adaptation among *Drosophila* species. *Evolution (N. Y.)*. **55**,  
579 1063–1068.
- 580 **Habibi, J., Brandt, S. L., Coudron, T. A., Wagner, R. M., Wright, M. K., Backus, E. A. and**  
581 **Huesing, J. E.** (2002). Uptake, flow, and digestion of casein and green fluorescent protein  
582 in the digestive system of *Lygus hesperus* Knight. *Arch. Insect Biochem. Physiol.* **50**, 62–  
583 74.
- 584 **Hanrahan, J. W., Meredith, J., Phillips, J. E. and Brandys, D.** (1984). Methods for the Study  
585 of Transport and Control in Insect Hindgut. In *Measurement of ion transport and metabolic*  
586 *rate in insects* (ed. Bradley, T. J.), pp. 19–68. Springer-Verlag New York Inc.
- 587 **Harvey, W. R. and Zerahn, K.** (1972). Active transport of potassium and other alkali metals by  
588 the isolated midgut of the silkworm. *Curr. Top. Membr. Transp.* **3**, 367–410.
- 589 **Hosler, J. S., Burns, J. E. and Esch, H. E.** (2000). Flight muscle resting potential and species-



- 590 specific differences in chill-coma. *J. Insect Physiol.* **46**, 621–627.
- 591 **Hoyle, G.** (1953). Potassium ions and insect nerve muscle. *J. Exp. Biol.* **30**, 121–135.
- 592 **Izumi, Y. and Furuse, M.** (2014). Molecular organization and function of invertebrate  
593 occluding junctions. *Semin. Cell Dev. Biol.* **36**, 186–193.
- 594 **Janmey, P. A.** (1998). The cytoskeleton and cell signaling: Component localization and  
595 mechanical coupling. *Physiol. Rev.* **78**, 763–781.
- 596 **Jonusaite, S., Donini, A. and Kelly, S. P.** (2016). Occluding junctions of invertebrate epithelia.  
597 *J. Comp. Physiol.* **186**, 17–43.
- 598 **Kayukawa, T. and Ishikawa, Y.** (2009). Chaperonin contributes to cold hardiness of the onion  
599 maggot *Delia antiqua* through repression of depolymerization of actin at low temperatures.  
600 *PLoS One.* **4**, e8277.
- 601 **Kim, M., Robich, R. M., Rinehart, J. P. and Denlinger, D. L.** (2006). Upregulation of two  
602 actin genes and redistribution of actin during diapause and cold stress in the northern house  
603 mosquito, *Culex pipiens*. *J. Insect Physiol.* **52**, 1226–1233.
- 604 **Koštál, V., Yanagimoto, M. and Bastl, J.** (2006). Chilling-injury and disturbance of ion  
605 homeostasis in the coxal muscle of the tropical cockroach (*Nauphoeta cinerea*). *Comp.*  
606 *Biochem. Physiol. B.* **143**, 171–179.
- 607 **Lane, N. J. and Flores, V.** (1988). Actin filaments are associated with the septate junctions of  
608 invertebrates. *Tissue Cell.* **20**, 211–217.
- 609 **le Skaer, H. B., P Maddrell, S. H. and Harrison, J. B.** (1987). The permeability properties of  
610 septate junctions in Malpighian tubules of *Rhodnius*. *J. Cell Sci.* **88**, 251–265.
- 611 **MacMillan, H. A. and Sinclair, B. J.** (2011a). Mechanisms underlying insect chill-coma. *J.*  
612 *Insect Physiol.* **57**, 12–20.
- 613 **MacMillan, H. A. and Sinclair, B. J.** (2011b). The role of the gut in insect chilling injury: cold-  
614 induced disruption of osmoregulation in the fall field cricket, *Gryllus pennsylvanicus*. *J.*  
615 *Exp. Biol.* **214**, 726–734.
- 616 **MacMillan, H. A., Findsen, A., Pedersen, T. H. and Overgaard, J.** (2014). Cold-induced  
617 depolarization of insect muscle: differing roles of extracellular K<sup>+</sup> during acute and chronic  
618 chilling. *J. Exp. Biol.* **217**, 2930–2938.
- 619 **MacMillan, H. A., Baatrup, E. and Overgaard, J.** (2015a). Concurrent effects of cold and  
620 hyperkalaemia cause insect chilling injury. *Proc. R. Soc. B Biol. Sci.* **282**, rspb.2015.1483.
- 621 **MacMillan, H. A., Andersen, J. L., Loeschcke, V. and Overgaard, J.** (2015b). Sodium  
622 distribution predicts the chill tolerance of *Drosophila melanogaster* raised in different  
623 thermal conditions. *Am. J. Physiol. Regul. Integr. Comp. Physiol.* **308**, R823–R831.
- 624 **MacMillan, H. A., Andersen, J. L., Davies, S. A. and Overgaard, J.** (2016a). The capacity to  
625 maintain ion and water homeostasis underlies interspecific variation in *Drosophila* cold  
626 tolerance. *Sci. Rep.* **5**, srep18607.
- 627 **MacMillan, H. A., Knee, J. M., Dennis, A. B., Udaka, H., Marshall, K. E., Merritt, T. J. S.**  
628 **and Sinclair, B. J.** (2016b). Cold acclimation wholly reorganizes the *Drosophila*  
629 *melanogaster* transcriptome and metabolome. *Sci. Rep.* **6**, srep28999.
- 630 **MacMillan, H. A., Yerushalmi, G. Y., Jonusaite, S., Kelly, S. P. and Donini, A.** (2017).  
631 Thermal acclimation mitigates cold-induced paracellular leak from the *Drosophila* gut. *Sci.*  
632 *Rep.* **7**, srep8807.
- 633 **Maddrell, S. H. P. and O'Donnell, M. J.** (1992). Insect Malpighian tubules: V-ATPase action  
634 in ion and fluid transport. *J. Exp. Biol.* **172**, 417–429.
- 635 **Mandel, L. J., Riddle, T. G. and Storey, J. M.** (1980). Role of ATP in respiratory control and

- 636 active transport in tobacco hornworm midgut. *Cell. Phys.* **238**, C10–C14.
- 637 **Matter, K. and Balda, M. S.** (2003). Functional analysis of tight junctions. *Methods.* **30**, 228–
- 638 234.
- 639 **Mattson, M. P. and Chan, S. L.** (2003). Calcium orchestrates apoptosis. *Nat. Cell Biol.* **5**,
- 640 1041–1043.
- 641 **McMullen, D. C. and Storey, K. B.** (2008). Suppression of Na<sup>+</sup>K<sup>+</sup>-ATPase activity by
- 642 reversible phosphorylation over the winter in a freeze-tolerant insect. *J. Insect Physiol.* **54**,
- 643 1023–1027.
- 644 **Moriyama, Y. and Nelson, N.** (1989). Cold inactivation of vacuolar proton-ATPases. *J. Biol.*
- 645 *Chem.* **264**, 3577–3582.
- 646 **Naikhwah, W. and O'Donnell, M. J.** (2012). Phenotypic plasticity in response to dietary salt
- 647 stress: Na<sup>+</sup> and K<sup>+</sup> transport by the gut of *Drosophila melanogaster* larvae. *J. Exp. Biol.*
- 648 **215**, 461–470.
- 649 **Nejdfors, P., Ekelund, M., Jeppsson, B. and Weström, B. R.** (2000). Mucosal in vitro
- 650 permeability in the intestinal tract of the pig, the rat, and man: species- and region-related
- 651 differences. *Scand. J. Gastroenterol.* **35**, 501–507.
- 652 **Nicotera, P. and Orrenius, S.** (1998). The role of calcium in apoptosis. *Cell Calcium* **23**, 173–
- 653 180.
- 654 **O'Donnell, M. J.** (2017). The V-ATPase in insect epithelia. *J. Exp. Biol.* **220**, 3201–3203.
- 655 **O'Donnell, M. J. and Maddrell, S. H. P.** (1983). Paracellular and transcellular routes for water
- 656 and solute movements across insect epithelia. *J. Exp. Biol.* **106**, 231–253.
- 657 **O'Donnell, M. J. and Ruiz-Sanchez, E.** (2015). The rectal complex and Malpighian tubules of
- 658 the cabbage looper (*Trichoplusia ni*): regional variations in Na<sup>+</sup> and K<sup>+</sup> transport and cation
- 659 reabsorption by secondary cells. *J. Exp. Biol.* **218**, 3206–3214.
- 660 **O'Donnell, M. J., Maddrell, S. H. P. and Gardiner, C.** (1984). Passage of solutes through
- 661 walls of Malpighian tubules of *Rhodnius* by paracellular and transcellular routes. *Am.*
- 662 *Physiol. Soc.* R759–R769.
- 663 **Overgaard, J. and MacMillan, H. A.** (2017). The integrative physiology of insect chill
- 664 tolerance. *Annu. Rev. Physiol.* **79**, 187–208.
- 665 **Pantzar, N., Weström, B. R., Luts, A. and Lundin, S.** (1993). Regional small-intestinal
- 666 permeability in vitro to different-sized dextrans and proteins in the rat. *Scand. J.*
- 667 *Gastroenterol.* **28**, 205–211.
- 668 **Phillips, J. E.** (1981). Comparative physiology of insect renal function. *Am. J. Physiol. Integr.*
- 669 *Comp. Physiol.* **241**, R241–R257.
- 670 **Phillips, J. E., Hanrahan, J. W., Chamberlin, M. and Thomson, B.** (1987). Mechanisms and
- 671 control of reabsorption in insect hindgut. *Adv. In Insect Phys.* **19**, 329–422.
- 672 **Rheuben, M. B.** (1972). The resting potential of moth muscle fibre. *J. Physiol.* **225**, 529–554.
- 673 **Robertson, R. M., Spong, K. E. and Srithiphaphirom, P.** (2017). Chill coma in the locust,
- 674 *Locusta migratoria*, is initiated by spreading depolarization in the central nervous system.
- 675 *Sci. Rep.* **7**, srep10297.
- 676 **Sasaki, S., Yui, N. and Noda, Y.** (2014). Actin directly interacts with different membrane
- 677 channel proteins and influences channel activities: AQP2 as a model. *Biochim. Biophys.*
- 678 *Acta - Biomembr.* **2**, 514–520.
- 679 **Wall, B. J. and Oschman, J. L.** (1970). Water and solute uptake by rectal pads of *Periplaneta*
- 680 *americana*. *Am. J. Physiol.* **218**, 1208–1215.
- 681 **Wood, C. M. and Grosell, M.** (2012). Independence of net water flux from paracellular

- 682 permeability in the intestine of *Fundulus heteroclitus*, a euryhaline teleost. *J. Exp. Biol.* **215**,  
683 508–517.
- 684 **Woods, D. F. and Bryant, P. J.** (1991). The discs-large tumor suppressor gene of *Drosophila*  
685 encodes a guanylate kinase homolog localized at septate junctions. *Cell.* **66**, 451–464.
- 686 **Woting, A. and Blaut, M.** (2018). Small intestinal permeability and gut-transit time determined  
687 with low and high molecular weight fluorescein isothiocyanate-dextrans in C3H mice.  
688 *Nutrients* **10**, nu10060685.
- 689 **Yerushalmi, G. Y., Misyura, L., MacMillan, H. A. and Donini, A.** (2018). Functional  
690 plasticity of the gut and the Malpighian tubules underlies cold acclimation and mitigates  
691 cold-induced hyperkalemia in *Drosophila melanogaster*. *J. Exp. Biol.* **221**, jeb174904.
- 692 **Yi, S. X. and Lee, R. E.** (2011). Rapid cold-hardening blocks cold-induced apoptosis by  
693 inhibiting the activation of pro-caspases in the flesh fly *Sarcophaga crassipalpis*. *Apoptosis*  
694 **16**, 249–255.
- 695 **Yi, S. X., Moore, C. W. and Lee, R. E.** (2007). Rapid cold-hardening protects *Drosophila*  
696 *melanogaster* from cold-induced apoptosis. *Apoptosis* **12**, 1183–1193.
- 697 **Zhu, W., Vandingenen, A., Huybrechts, R., Vercammen, T., Baggerman, G., De Loof, A.,**  
698 **Poulos, C. P., Velentza, A. and Breuer, M.** (2001). Proteolytic breakdown of the Neb-  
699 trypsin modulating oostatic factor (Neb-TMOF) in the hemolymph of different insects and  
700 its gut epithelial transport. *J. Insect Physiol.* **47**, 1235–1242.
- 701
- 702

703 Figures

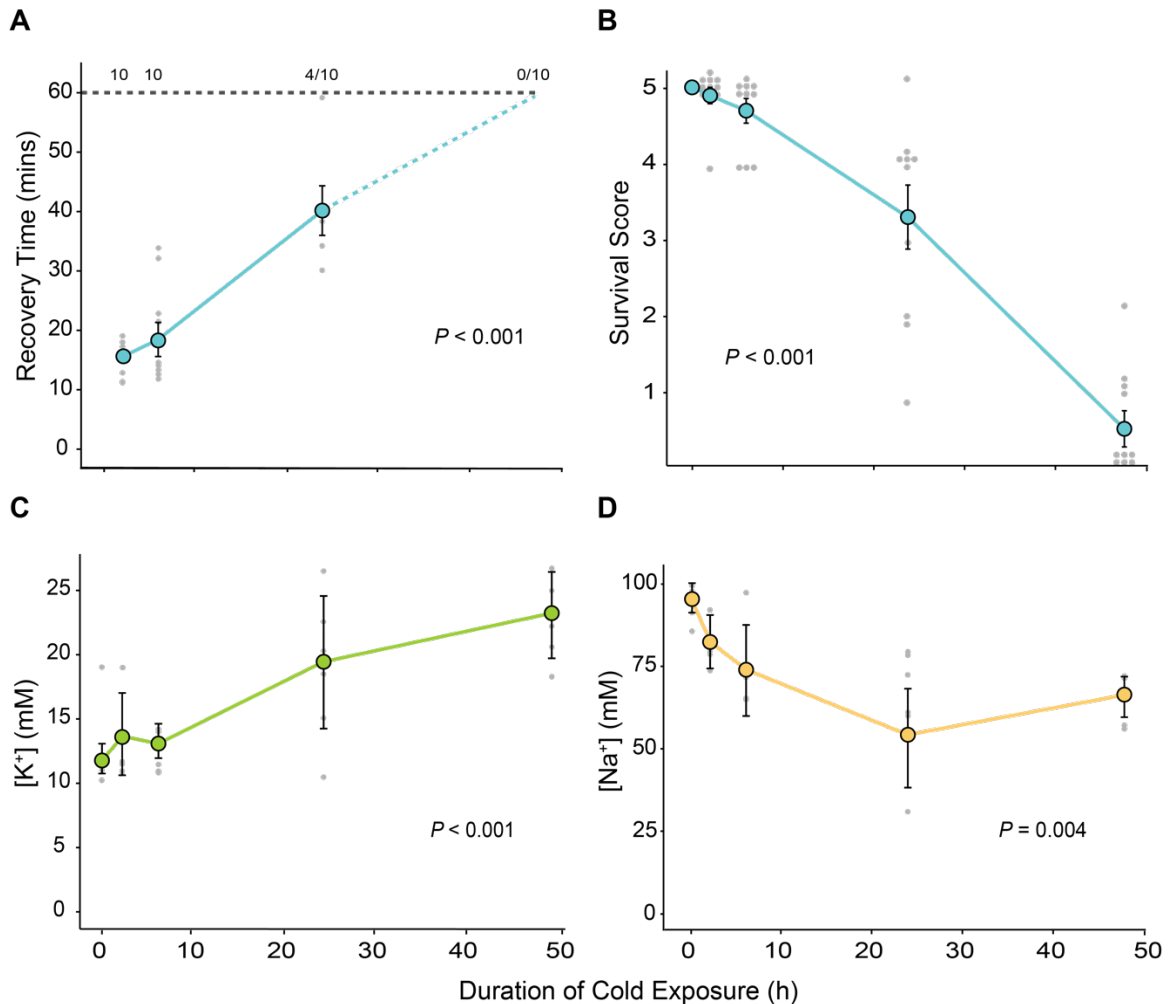

704

705

706 **Figure 1. Locusts (*L. migratoria*) suffer from injury and ionoregulatory collapse typical of**

707 **chill susceptible insects. A) Chill coma recovery time (CCRT) of locusts (mixed sexes; n = 10**

708 **per time point) held at -2 °C for 2, 6, 24, or 48 h. Locusts were observed for 60 mins following**

709 **cold exposure and were marked as having recovered when standing on all six limbs. Values**

710 **above the dotted black line represent the number of locusts that had recovered within 60**

711 **mins. The solid blue line represents mean values per time point. B) Locust condition (survival)**

712 **following exposure to -2°C for 0, 2, 6, 24, or 48 h (n = 10 per time point). Survival score was**

713 **based on the following: 0: no movement observed (i.e. dead); 1: limb movement (leg and or head**

714 **twitching); 2: moving, but unable to stand; 3: able to stand, but unable or unwilling to walk or**

715 **jump; 4: able to stand, walk, and or jump, but lacks coordination; and 5: movement restored pre-**

716 **exposure levels of coordination. The solid blue line represents mean values per time point. To**

717 **show all data points, dots are clustered around their respective score (where applicable). C)**

718 **Changes in locust hemolymph K<sup>+</sup> concentrations over time spent at -2°C (n = 5-6 locusts per**

719 **time point). D) Samples of locust hemolymph Na<sup>+</sup> concentrations over time spent at -2°C (n = 4-**

720 **6 locusts per time point). Values are mean ± standard error. Light grey points represent each**

721 **sample taken per time point. Error bars not shown are obscured by the symbols.**

722

723

724

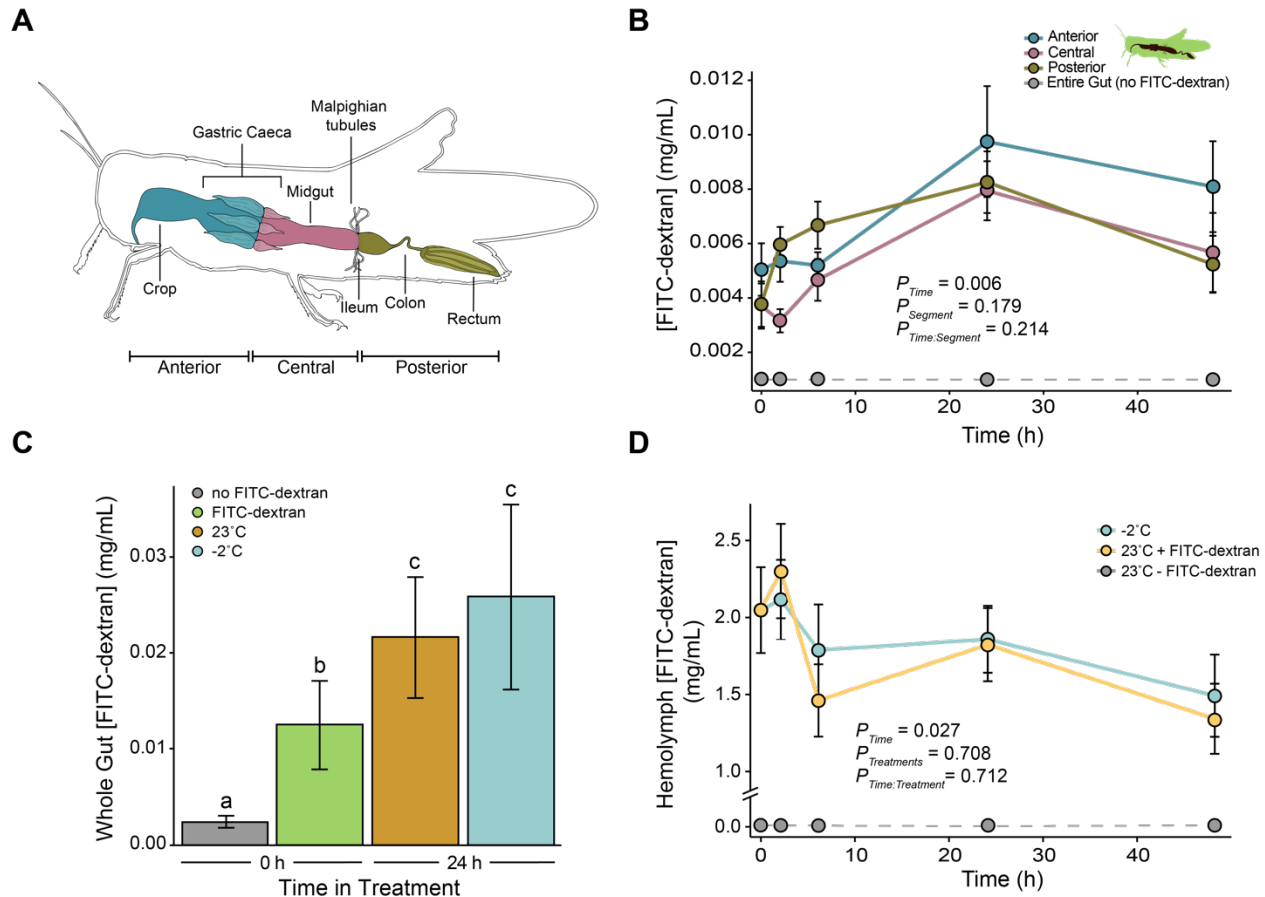

725

726

727

728

729

730

731

732

733

734

735

736

737

738

739

740

741

742

**Figure 2. Cold stress causes minimal leak of FITC-dextran across the gut epithelia of *L. migratoria* in the serosal to mucosal direction.** **A)** A schematic of the locust (*L. migratoria*) gut tract sectioned into three segments (anterior, central, and posterior). Relative to the locust gut anatomy, the segments were determined as follows: anterior – foregut to the anterior midgut caeca; central – posterior midgut caeca to the Malpighian tubules (removed; the midgut-hindgut junction); posterior – Malpighian tubules to the rectum. Figure illustrated from observation. **B)** Concentration of injected FITC-dextran (mg/mL) present in to each gut segment (anterior, central, and posterior; n = 4-6 per group) after exposure to -2°C for 2, 6, 24, or 48 h. **C)** Mean values representing the total FITC-dextran content within the gut (sum of anterior, central, and posterior segments) at 24 h of either 23°C (control) or -2°C (n = 4-6 per group). Means shown at 0 h were sampled immediately post-injection (FITC-dextran or saline). Letters denote a significant difference ( $P_{Time} < 0.001$ ;  $P_{Treatment} = 0.758$ ). **D)** Concentration of injected FITC-dextran remaining in the hemolymph over 48 h in the cold (-2°C) and at room temperature (n = 4-6 per group). Values are mean  $\pm$  standard error. Error bars not shown are obscured by the symbols.

743  
744  
745  
746  
747

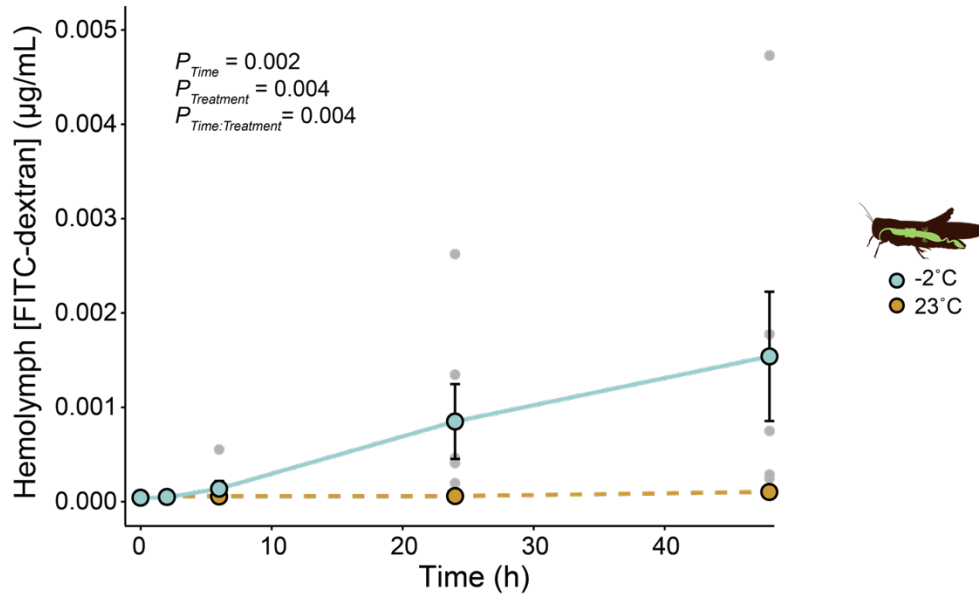

748  
749  
750  
751  
752  
753  
754  
755

**Figure 3. FITC-dextran leaks in the mucosal to serosal direction across the gut of *L. migratoria*.** Levels of hemolymph FITC-dextran (µg/mL) following oral administration of the marker and either 2, 6, 24, or 48 h at -2°C (n = 6 per time point). The dotted line represents sampled control locusts across 48 h at 23°C (n = 6 per time point). Values are mean ± standard error. Grey points represent each sample taken per time point. Error bars not shown are obscured by the symbols.
